# Supplementary material for: Menthol-induced sedation and hemodynamic safety limits in Nile tilapia: defining a therapeutic window
Source: Research Square preprint supplement (doi:10.21203/rs.3.rs-8309307/v1), 2025-12-31
Supplement: Supplementary file 1 [file ba586db68a9f3fd234a88a97.docx]

| 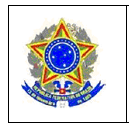 | **Ministry of Education - Brazil**  **Federal University of Pará**  Belém – PA- Brazil | **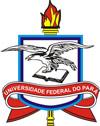** |
| --- | --- | --- |

Through the study entitled "Menthol-induced sedation and hemodynamic safety limits in Nile tilapia: defining a therapeutic window" we can consider the following Highlights:

 Menthol induced dose-dependent bradycardia and ECG alterations in Oreochromis niloticus.

 Concentrations between 100–200 mg L⁻¹ ensured safe anesthesia and full cardiac recovery.

 High menthol doses (>200 mg L⁻¹) caused sinus rhythm depression and delayed recovery.

 Flumazenil antagonism revealed GABAAA​-mediated mechanism of menthol anesthesia.

 Findings highlight ecotoxicological risks of natural anesthetics in aquatic environments.

**Axell Lins, M.Sc.**
Corresponding Author
Laboratory of Pharmacology and Toxicology of Natural Products
Federal University of Pará (UFPA)
R. Augusto Corrêa, 01 – Guamá, Belém – Pará, Brazil
Tel: +55 91 98022-2421
Email: axell.ti20@gmail.com
